# Supplementary material for: TriPer, an optical probe tuned to the endoplasmic reticulum tracks changes in luminal H2O2
Source: PubMed Central journal article supplement (PMC5368998; doi:10.1186/s12915-017-0367-5), 2017-03-27

Fig. S2

A

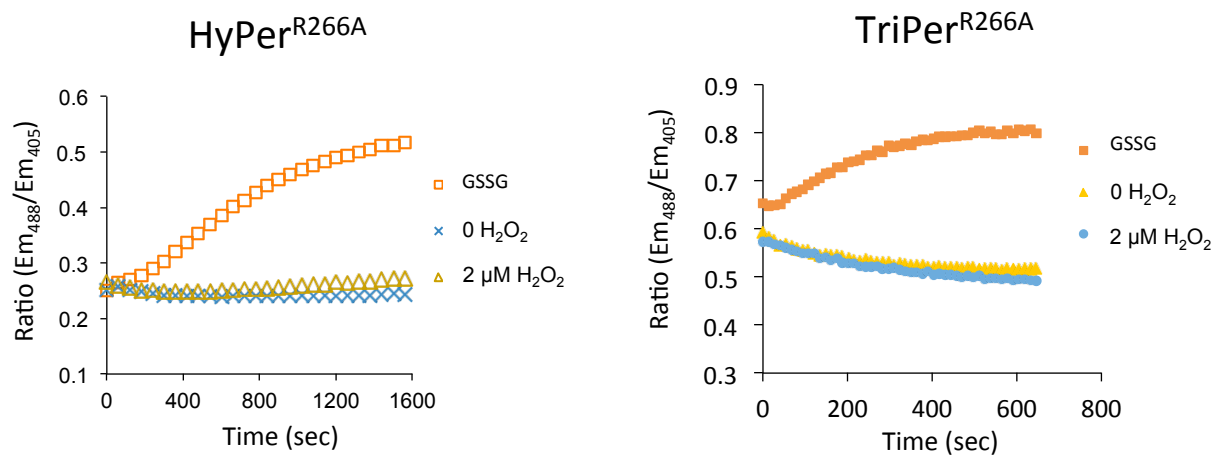

B

TriPer<sup>R266A</sup>

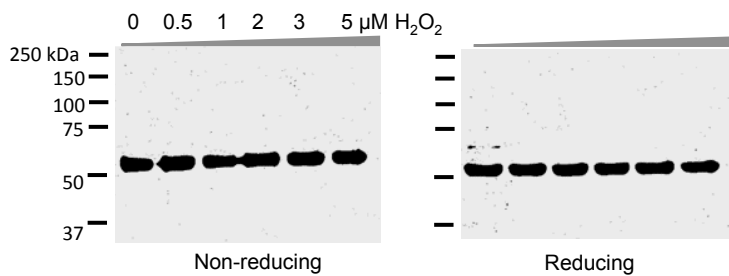

C

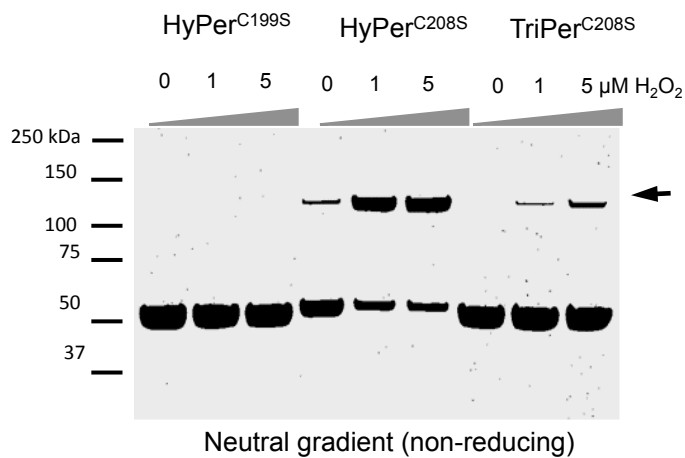

D

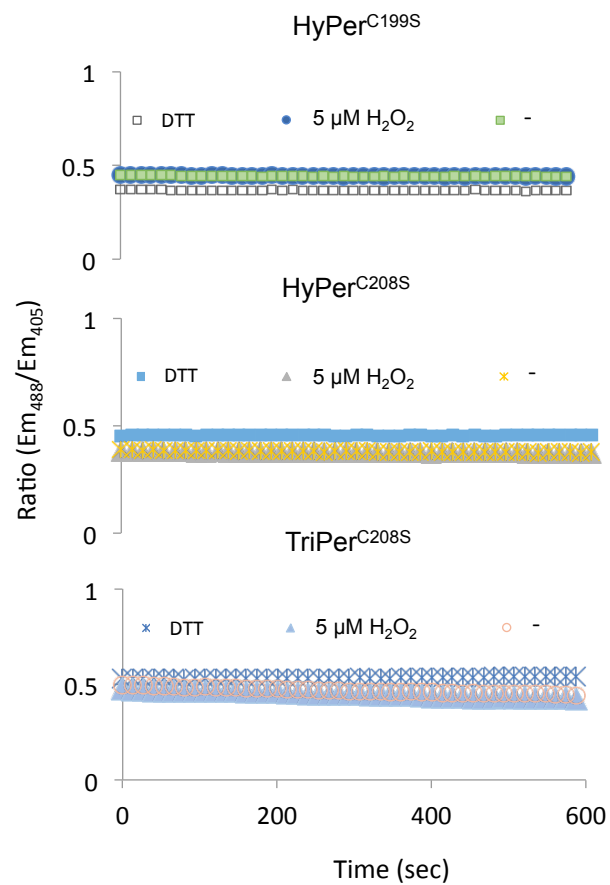

Supplement: 12915_2017_367_MOESM2_ESM.pdf [file 12915_2017_367_MOESM2_ESM.pdf]
